# Supplementary material for: Exercise capacity impairment after COVID-19 pneumonia is mainly caused by deconditioning
Source: PubMed Central journal article supplement — Eur Respir J. 2022 Jan 1;59(1):2101136. doi: 10.1183/13993003.01136-2021 (PMC8573604; doi:10.1183/13993003.01136-2021), 2022-01-01

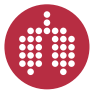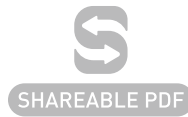

# Exercise capacity impairment after COVID-19 pneumonia is mainly caused by deconditioning

Kathleen Jahn<sup>1</sup>, Mihaela Sava<sup>2</sup>, Gregor Sommer <sup>3</sup>, Desiree M. Schumann<sup>1</sup>, Stefano Bassetti<sup>4</sup>, Martin Siegemund<sup>5,6</sup>, Manuel Battegay<sup>2</sup>, Daiana Stolz<sup>1</sup>, Michael Tamm<sup>1</sup>, Nina Khanna<sup>2</sup> and Katrin E. Hostettler<sup>1</sup>

<sup>1</sup>Clinics of Respiratory Medicine, University Hospital Basel and University of Basel, Basel, Switzerland. <sup>2</sup>Division of Infectious Diseases and Hospital Epidemiology, University Hospital Basel and University of Basel, Basel, Switzerland. <sup>3</sup>Dept of Radiology, University Hospital Basel and University of Basel, Basel, Switzerland. <sup>4</sup>Division of Internal Medicine, University Hospital Basel and University of Basel, Basel, Switzerland. <sup>5</sup>Dept of Clinical Research, University Hospital Basel and University of Basel, Basel, Switzerland. <sup>6</sup>Dept of Intensive Care Medicine, University Hospital Basel and University of Basel, Basel, Switzerland.

Corresponding author: Katrin E. Hostettler ([katrin.hostettler@usb.ch](mailto:katrin.hostettler@usb.ch))

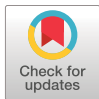

Shareable abstract (@ERSpublications)

**Not pulmonary factors, but physical deconditioning is the main limiting factor of exercise capacity in patients after severe COVID-19 pneumonitis. This underscores the importance of an early rehabilitative intervention in these patients.** <https://bit.ly/2XVvr6C>

**Cite this article as:** Jahn K, Sava M, Sommer G, *et al.* Exercise capacity impairment after COVID-19 pneumonia is mainly caused by deconditioning. *Eur Respir J* 2022; 59: 2101136 [DOI: 10.1183/13993003.01136-2021].

This single-page version can be shared freely online.

Copyright ©The authors 2022

This version is distributed under the terms of the Creative Commons Attribution Non-Commercial Licence 4.0. For commercial reproduction rights and permissions contact [permissions@ersnet.org](mailto:permissions@ersnet.org)

Received: 23 April 2021  
Accepted: 10 Oct 2021

*To the Editor:*

The new severe acute respiratory syndrome (SARS) coronavirus 2 (SARS-CoV-2) can cause severe pneumonia characterised by dry cough, dyspnoea, hypoxaemia and diffuse ground glass opacities on chest computed tomography (CT) [1]. While much has been learnt concerning diagnosis and treatment of coronavirus disease 2019 (COVID-19) during the first year of the pandemic, only scarce data is available concerning post-COVID long-term pulmonary sequelae. Data about pulmonary function in early convalescence demonstrated impaired diffusion capacity, lower respiratory muscle strength, and radiological abnormalities [2, 3]. Herein we report data of cardio-pulmonary exercise testing (CPET) 3 months after severe COVID-19 pneumonitis.

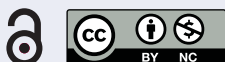

Supplement: ERJ-01136-2021.Shareable.pdf [file ERJ-01136-2021.Shareable.pdf]
